# Supplementary material
Source: Elsevier journal article supplement (https://comptes-rendus.academie-sciences.fr/chimie/article/10.1016/j.crci.2011.09.006/file/attach/mmc1.pdf)
Supplement: mmc1 [file mmc1.pdf]

## Supplementary data:

| Product | Structure                                                                           | Spectral data                                                                                                                                                                                                                                                                                                                                                                                                                                                                                                               |
|---------|-------------------------------------------------------------------------------------|-----------------------------------------------------------------------------------------------------------------------------------------------------------------------------------------------------------------------------------------------------------------------------------------------------------------------------------------------------------------------------------------------------------------------------------------------------------------------------------------------------------------------------|
| 2aa     | 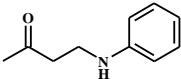   | <b><sup>1</sup>H NMR (300 MHz, CDCl<sub>3</sub>):</b> δ 2.16 (s, 3H, CH <sub>3</sub> ), 2.73 (t, 2H, <i>J</i> = 6.3 Hz, CH <sub>2</sub> ), 3.41 (t, 2H, <i>J</i> = 6.3 Hz, CH <sub>2</sub> ), 6.60-6.70 (m, 3H, ArH), 7.18 (t, 2H, <i>J</i> = 8.4 Hz, ArH); <b><sup>13</sup>C NMR (75 MHz, CDCl<sub>3</sub>):</b> δ 30.27, 38.39, 42.60, 113.06, 117.64, 129.31, 147.72, 208.22 ppm.                                                                                                                                        |
| 2ab     |    | <b><sup>1</sup>H NMR (300 MHz, CDCl<sub>3</sub>):</b> δ 2.16 (3H, s, CH <sub>3</sub> ), 2.25 (3H, s, CH <sub>3</sub> ), 2.73 (2H, t, <i>J</i> = 6.0 Hz, CH <sub>2</sub> ), 3.39 (2H, t, <i>J</i> = 6.3 Hz, CH <sub>2</sub> ), 3.40-3.50 (1H, brs, NH), 6.55 (2H, d, <i>J</i> = 8.1 Hz, ArH), 7.0 (2H, d, <i>J</i> = 8.4 Hz, ArH), <b><sup>13</sup>C NMR (75 MHz, CDCl<sub>3</sub>):</b> δ 20.38, 30.26, 38.81, 42.62, 113.34, 126.91, 129.80, 145.42, 208.32 ppm.                                                           |
| 2ac     |    | <b><sup>1</sup>H NMR (300 MHz, CDCl<sub>3</sub>):</b> δ 2.13 (3H, s, CH <sub>3</sub> ), 2.70 (2H, t, <i>J</i> = 6.0 Hz, CH <sub>2</sub> ), 3.33 (2H, t, <i>J</i> = 6.0 Hz, CH <sub>2</sub> ), 3.72 (3H, s, OCH <sub>3</sub> ), 6.44-6.82 (4H, m, ArH) <b><sup>13</sup>C NMR (75 MHz, CDCl<sub>3</sub>):</b> δ 30.24, 39.53, 42.62, 55.74, 114.60, 114.90, 141.90, 152.33, 208.34 ppm.                                                                                                                                       |
| 2ad     |    | <b><sup>1</sup>H NMR (300 MHz, CDCl<sub>3</sub>):</b> δ 2.14 (3H, s, CH <sub>3</sub> ), 2.69 (2H, t, <i>J</i> = 6.0 Hz, CH <sub>2</sub> ), 3.35 (2H, t, <i>J</i> = 6.0 Hz, CH <sub>2</sub> ), 6.46 (2H, d, <i>J</i> = 8.7 Hz, ArH), 7.06 (2H, d, <i>J</i> = 8.7 Hz, ArH). <b><sup>13</sup>C NMR (75 MHz, CDCl<sub>3</sub>):</b> δ 30.3, 38.5, 42.4, 114.1, 122.1, 129.1, 146.3, 208.0 ppm.                                                                                                                                  |
| 2ae     |  | <b><sup>1</sup>H NMR (300 MHz, CDCl<sub>3</sub>):</b> δ 2.17 (3H, s, CH <sub>3</sub> ), 2.73 (2H, t, <i>J</i> = 6.0 Hz, CH <sub>2</sub> ), 3.37 (2H, t, <i>J</i> = 6.0 Hz, CH <sub>2</sub> ), 6.47 (2H, d, <i>J</i> = 8.7 Hz, ArH), 7.24 (2H, d, <i>J</i> = 8.7 Hz, ArH) <b><sup>13</sup>C NMR (75 MHz, CDCl<sub>3</sub>):</b> δ 30.29, 38.34, 42.31, 108.56, 114.56, 131.98, 146.68, 207.91 ppm.                                                                                                                           |
| 2ba     |  | <b><sup>1</sup>H NMR (300 MHz, CDCl<sub>3</sub>):</b> δ 1.05 (3H, t, <i>J</i> = 7.2 Hz, CH <sub>3</sub> ), 2.44 (2H, q, <i>J</i> = 7.2 Hz, CH <sub>2</sub> ), 2.72 (2H, t, <i>J</i> = 6 Hz, CH <sub>2</sub> ), 3.42 (2H, t, <i>J</i> = 6 Hz, CH <sub>2</sub> ), 4.01 (1H, brs, NH), 6.60-6.62 (2H, m, ArH), 6.69-6.72 (1H, m, ArH), 7.15-7.25 (2H, m, ArH) <b><sup>13</sup>C NMR (75 MHz, CDCl<sub>3</sub>):</b> δ 7.6, 36.2, 38.3, 41.1, 112.9, 117.5, 129.2, 147.6, 210.9 ppm                                             |
| 2bb     |  | <b><sup>1</sup>H NMR (300 MHz, CDCl<sub>3</sub>):</b> δ 1.04 (3H, t, <i>J</i> = 7.2 Hz, CH <sub>3</sub> ), 2.23 (3H, s, CH <sub>3</sub> ), 2.43 (2H, q, <i>J</i> = 7.2 Hz, CH <sub>2</sub> ), 2.70 (2H, t, <i>J</i> = 6 Hz, CH <sub>2</sub> ), 3.39 (2H, t, <i>J</i> = 6 Hz, CH <sub>2</sub> ), 3.88 (1H, brs, NH), 6.53 (2H, d, <i>J</i> = 8.0 Hz, ArH), 6.78 (2H, d, <i>J</i> = 8.0 Hz, ArH) <b><sup>13</sup>C NMR (75 MHz, CDCl<sub>3</sub>):</b> δ 7.6, 20.3, 36.2, 38.8, 41.2, 113.2, 126.8, 129.7, 145.3, 211.0 ppm.  |
| 2bc     |  | <b><sup>1</sup>H NMR (300 MHz, CDCl<sub>3</sub>):</b> δ 1.05 (3H, t, <i>J</i> = 7.2 Hz, CH <sub>3</sub> ), 2.44 (2H, q, <i>J</i> = 7.2 Hz, CH <sub>2</sub> ), 2.71 (2H, t, <i>J</i> = 6 Hz, CH <sub>2</sub> ), 3.36 (2H, t, <i>J</i> = 6 Hz, CH <sub>2</sub> ), 3.28 (3H, s, OCH <sub>3</sub> ), 4.05 (1H, brs, NH), 6.66 (2H, d, <i>J</i> = 7.2 Hz, ArH), 6.78 (2H, d, <i>J</i> = 7.2 Hz, ArH) <b><sup>13</sup>C NMR (75 MHz, CDCl<sub>3</sub>):</b> δ 7.6, 36.2, 39.5, 41.2, 55.6, 114.5, 114.7, 141.8, 152.1, 211.1 ppm. |

|     |                                                                                     |                                                                                                                                                                                                                                                                                                                                                                                                                                                                                                                                                                                                        |
|-----|-------------------------------------------------------------------------------------|--------------------------------------------------------------------------------------------------------------------------------------------------------------------------------------------------------------------------------------------------------------------------------------------------------------------------------------------------------------------------------------------------------------------------------------------------------------------------------------------------------------------------------------------------------------------------------------------------------|
| 2bd | 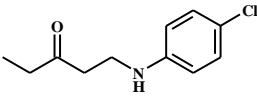   | <b><sup>1</sup>H NMR (300 MHz, CDCl<sub>3</sub>):</b> δ 1.06 (3H, t, <i>J</i> = 7.2 Hz, CH <sub>3</sub> ), 2.45 (2H, q, <i>J</i> = 7.2 Hz, CH <sub>2</sub> ), 2.72 (2H, t, <i>J</i> = 6 Hz, CH <sub>2</sub> ), 3.39 (2H, t, <i>J</i> = 6 Hz, CH <sub>2</sub> ), 4.07 (1H, brs, NH), 6.53 (2H, d, <i>J</i> = 8.8 Hz, ArH), 7.12 (2H, d, <i>J</i> = 8.8 Hz, ArH) <b><sup>13</sup>C NMR (75 MHz, CDCl<sub>3</sub>):</b> δ 7.6, 36.3, 38.4, 40.9, 114.0, 121.9, 129.0, 146.2, 210.8 ppm                                                                                                                    |
| 3aa |    | <b><sup>1</sup>H NMR (300 MHz, CDCl<sub>3</sub>):</b> δ 1.64-1.79 (2H, m, CH <sub>2</sub> ), 1.99-2.09 (2H, m, CH <sub>2</sub> ), 2.15-2.43 (4H, m, 2 x CH <sub>2</sub> ), 2.83 (1H, m, CH), 3.78 (1H, brs, NH), 6.69-6.77 (2H, m, ArH), 7.13-7.19 (3H, m, ArH) <b><sup>13</sup>C NMR (75 MHz, CDCl<sub>3</sub>):</b> δ 21.8, 30.7, 40.8, 48.2, 52.0, 113.0, 117.6, 129.1, 146, 209.4 ppm.                                                                                                                                                                                                             |
| 3ab |    | <b><sup>1</sup>H NMR (300 MHz, CDCl<sub>3</sub>):</b> δ 1.67-1.72 (2H, m, CH <sub>2</sub> ), 2.03-2.16 (2H, m, CH <sub>2</sub> ), 2.24-2.43 (4H, m, 2 x CH <sub>2</sub> ), 2.78-2.82 (1H, m, CH), 3.73 (1H, brs, NH), 6.51 (2H, d, <i>J</i> = 8 Hz, ArH), 6.98 (2H, d, <i>J</i> = 8 Hz, ArH) <b><sup>13</sup>C NMR (75 MHz, CDCl<sub>3</sub>):</b> δ 20.6, 22.4, 31.3, 41.4, 48.9, 52.9, 113.8, 127.4, 130.1, 144.2, 210.1 ppm.                                                                                                                                                                        |
| 3ad |   | <b><sup>1</sup>H NMR (300 MHz, CDCl<sub>3</sub>):</b> δ 1.62-1.77 (2H, m, CH <sub>2</sub> ), 2.00-2.20 (2H, m, CH <sub>2</sub> ), 2.23-2.43 (4H, m, 2 x CH <sub>2</sub> ), 2.81-2.83 (1H, m, CH), 3.74 (1H, brs, NH), 6.50 (2H, d, <i>J</i> = 8 Hz, ArH), 7.11 (2H, d, <i>J</i> = 8 Hz, ArH) <b><sup>13</sup>C NMR (75 MHz, CDCl<sub>3</sub>):</b> δ 22.3, 31.1, 41.3, 48.5, 52.6, 114.6, 122.6, 129.5, 145.1, 209.6 ppm.                                                                                                                                                                              |
| 4ac |  | <b><sup>1</sup>H NMR (300 MHz, CDCl<sub>3</sub>):</b> δ 3.36-3.54 (2H, m, CH <sub>2</sub> ), 3.68 (3H, s, CH <sub>3</sub> ), 4.23 (1H, m, CH), 4.92 (1H, brs, NH), 6.52 (2H, d, <i>J</i> = 8.4 Hz, ArH), 6.67 (2H, d, <i>J</i> = 8.4 Hz, ArH), 7.22 (1H, t, <i>J</i> = 7.2 Hz, ArH), 7.31 (1H, t, <i>J</i> = 7.2 Hz, ArH), 7.42-7.43 (4H, m, ArH), 7.55 (1H, t, <i>J</i> = 7.2 Hz, ArH), 7.90 (2H, d, <i>J</i> = 7.6 Hz, ArH) <b><sup>13</sup>C NMR (75 MHz, CDCl<sub>3</sub>):</b> δ 39.9, 46.4, 55.6, 114.7, 115.3, 126.4, 127.3, 128.2, 128.7, 128.8, 133.4, 136.7, 141.2, 143.2, 152.3, 198.3 ppm. |
| 5aa |  | <b>IR (Neat):</b> 1731, 3410 cm <sup>-1</sup> <b><sup>1</sup>H NMR (300 MHz, CDCl<sub>3</sub>):</b> δ 2.64 (2H, t, <i>J</i> = 6.3 Hz, CH <sub>2</sub> ), 3.47 (2H, t, <i>J</i> = 6.3 Hz, CH <sub>2</sub> ), 3.72 (3H, s, OCH <sub>3</sub> ), 6.65 (2H, d, <i>J</i> = 8.4 Hz, ArH), 6.75 (1H, t, <i>J</i> = 7.5 Hz, ArH), 7.21 (2H, t, <i>J</i> = 8.4 Hz, ArH) <b><sup>13</sup>C NMR (75 MHz, CDCl<sub>3</sub>):</b> δ 33.73, 39.42, 51.76, 113.06, 115.11, 117.75, 129.29, 147.59, 172.86 ppm.                                                                                                         |
| 5ab |  | <b><sup>1</sup>H NMR (300 MHz, CDCl<sub>3</sub>):</b> δ 2.26 (3H, s, CH <sub>3</sub> ), 2.61-2.65 (2H, t, <i>J</i> = 6.2 Hz, CH <sub>2</sub> ), 3.43-3.46 (2H, t, <i>J</i> = 6.4 Hz, CH <sub>2</sub> ), 3.71 (3H, s, OCH <sub>3</sub> ), 3.30-4.12 (1H, brs, NH), 6.56-6.58 (2H, d, <i>J</i> = 7.6 Hz, ArH), 7.0-7.02 (2H, d, <i>J</i> = 8.0 Hz, ArH) <b><sup>13</sup>C NMR (75 MHz, CDCl<sub>3</sub>):</b> δ 20.28, 33.63, 39.74, 51.61, 113.23, 126.96, 129.72, 145.14, 172.79 ppm.                                                                                                                  |

|     |                                                                                     |                                                                                                                                                                                                                                                                                                                                                                                                         |
|-----|-------------------------------------------------------------------------------------|---------------------------------------------------------------------------------------------------------------------------------------------------------------------------------------------------------------------------------------------------------------------------------------------------------------------------------------------------------------------------------------------------------|
| 5ac | 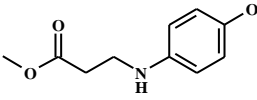   | $^1\text{H NMR (300 MHz, CDCl}_3\text{): } \delta$ 2.52 (2H, t, $J$ = 7.2 Hz, $\text{CH}_2$ ), 3.52 (2H, t, $J$ = 7.5 Hz, $\text{CH}_2$ ), 3.64 (3H, s, $\text{OCH}_3$ ), 3.73 (3H, s, $\text{OCH}_3$ ), 6.57 - 6.83 (4H, m, ArH) $^{13}\text{C NMR (75 MHz, CDCl}_3\text{): } \delta$ 32.35, 48.09, 51.63, 55.62, 114.60, 114.87, 116.39, 141.34, 152.67, 172.64 ppm.                                  |
| 5ae |    | $^1\text{H NMR (300 MHz, CDCl}_3\text{): } \delta$ 2.61 (2H, t, $J$ = 6.3 Hz, $\text{CH}_2$ ), 3.41 (2H, t, $J$ = 6.3 Hz, $\text{CH}_2$ ), 3.70 (3H, s, $\text{OCH}_3$ ), 6.57 (2H, d, $J$ = 9 Hz, ArH), 7.36 (2H, d, $J$ = 9 Hz, ArH) $^{13}\text{C NMR (75 MHz, CDCl}_3\text{): } \delta$ 33.9, 39.6, 52.3, 115, 116.9, 132.4, 146.7, 173 ppm.                                                        |
| 5ad |    | $^1\text{H NMR (300 MHz, CDCl}_3\text{): } \delta$ 2.60-2.63 (2H, t, $J$ = 6 Hz, $\text{CH}_2$ ), 3.41-3.44 (2H, t, $J$ = 6.2 Hz, $\text{CH}_2$ ), 3.71 (3H, s, $\text{OCH}_3$ ), 4.05 (1H, brs, NH), 6.53-6.56 (2H, d, $J$ = 8.8 Hz, ArH), 7.11-7.14 (2H, d, $J$ = 8.8 Hz, ArH) $^{13}\text{C NMR (75 MHz, CDCl}_3\text{): } \delta$ 33.42, 39.42, 51.71, 114.02, 122.25, 129.03, 146.01, 172.59 ppm.  |
| 5af |    | $^1\text{H NMR (300 MHz, CDCl}_3\text{): } \delta$ 2.67 (2H, t, $J$ = 6.3 Hz, $\text{CH}_2$ ), 3.56 (2H, t, $J$ = 6.3 Hz, $\text{CH}_2$ ), 3.72 (3H, s, $\text{OCH}_3$ ), 6.55 (2H, d, $J$ = 9 Hz, ArH), 8.07 (2H, d, $J$ = 9 Hz, ArH) $^{13}\text{C NMR (75 MHz, CDCl}_3\text{): } \delta$ 33.6, 39, 52.3, 111.21, 113.40, 126.38, 126.49, 172.59 ppm.                                                 |
| 7aa |    | $^1\text{H NMR (300 MHz, CDCl}_3\text{): } \delta$ 2.62 (2H, t, $J$ = 6.6 Hz, $\text{CH}_2$ ), 3.51 (2H, t, $J$ = 6.3 Hz, $\text{CH}_2$ ), 3.59 (1H, s, NH), 6.64 (2H, d, $J$ = 7.5, ArH), 6.79 (1H, t, $J$ = 7.5 Hz, Ar-H), 7.24 (2H, t, $J$ = 7.8 Hz), $^{13}\text{C NMR (75 MHz, CDCl}_3\text{): } \delta$ 18.08, 39.76, 113.08, 118.57, 129.56, 146.26 ppm.                                         |
| 7ab |  | $^1\text{H NMR (300 MHz, CDCl}_3\text{): } \delta$ 2.29 (3H, s, $\text{CH}_3$ ), 2.61-2.64 (2H, t, $J$ = 6.4 Hz, $\text{CH}_2$ ), 3.49-3.52 (2H, t, $J$ = 6.4 Hz, $\text{CH}_2$ ), 3.60 (1H, brs, NH), 6.57-6.59 (2H, d, $J$ = 8.4 Hz, ArH), 7.05-7.07 (2H, d, $J$ = 8.0 Hz, ArH) $^{13}\text{C NMR (75 MHz, CDCl}_3\text{): } \delta$ 18.02, 20.31, 40.10, 113.28, 118.30, 127.86, 129.96, 143.81 ppm. |
| 7ad |  | $^1\text{H NMR (300 MHz, CDCl}_3\text{): } \delta$ 2.62-2.66 (2H, t, $J$ = 6.6 Hz, $\text{CH}_2$ ), 3.48-3.52 (2H, t, $J$ = 6.4 Hz, $\text{CH}_2$ ), 3.99 (1H, brs, NH), 6.55-6.57 (2H, d, $J$ = 8.8 Hz, ArH), 7.16-7.18 (2H, d, $J$ = 9.2 Hz, ArH) $^{13}\text{C NMR (75 MHz, CDCl}_3\text{): } \delta$ 18.0, 39.78, 114.11, 117.93, 123.22, 129.31, 144.70 ppm.                                       |
| 7ac |  | $^1\text{H NMR (300 MHz, CDCl}_3\text{): } \delta$ 2.62 (2H, t, $J$ = 6.3 Hz, $\text{CH}_2$ ), 3.48 (2H, t, $J$ = 6.3 Hz, $\text{CH}_2$ ), 3.76 (3H, s, $\text{OCH}_3$ ), 6.66 (2H, d, $J$ = 9.0 Hz, ArH), 6.81 (2H, d, $J$ = 9.0 Hz, Ar-H), $^{13}\text{C NMR (75 MHz, CDCl}_3\text{): } \delta$ 18.15, 40.86, 55.75, 114.80, 115.09, 118.31, 140.07, 152.97 ppm..                                     |
| 8ac |  | $^1\text{H NMR (300 MHz, CDCl}_3\text{): } \delta$ 1.80 (2H, brs, $\text{NH}_2$ ) 2.52 (2H, t, $J$ = 6 Hz, $\text{CH}_2$ ), 3.42 (2H, t, $J$ = 6.3 Hz, $\text{CH}_2$ ), 3.75 (3H, s, $\text{OCH}_3$ ), 6.64 (2H, d, $J$ = 8.7 Hz, ArH), 6.81 (2H, d, $J$ = 9 Hz, ArH), $^{13}\text{C NMR (75 MHz, CDCl}_3\text{): } \delta$ 34.95, 41.05, 55.76, 114.91, 115.02, 141.60, 152.67, 173.99 ppm.            |

|     |                                                                                     |                                                                                                                                                                                                                                                                                                                                                                                                                                   |
|-----|-------------------------------------------------------------------------------------|-----------------------------------------------------------------------------------------------------------------------------------------------------------------------------------------------------------------------------------------------------------------------------------------------------------------------------------------------------------------------------------------------------------------------------------|
| 8ab | 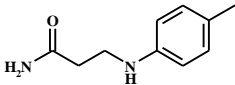   | $^1\text{H NMR}$ (300 MHz, $\text{CDCl}_3$ ): $\delta$ 2.23 (3H, s, $\text{CH}_3$ ), 2.49 (2H, t, $J = 5.9$ Hz, $\text{CH}_2$ ), 3.40 (2H, t, $J = 5.9$ Hz, $\text{CH}_2$ ), 6.56 (2H, d, $J = 8.07$ Hz, ArH), 7.0 (2H, d, $J = 8.07$ Hz, ArH) $^{13}\text{C NMR}$ (75 MHz, $\text{CDCl}_3$ ): $\delta$ 20.2, 34.8, 40.2, 113.5, 127.3, 129.7, 145.0, 174.7 ppm.                                                                  |
| 8ae |    | $^1\text{H NMR}$ (300 MHz, $\text{CDCl}_3$ ): $\delta$ 2.50 (2H, t, $J = 6.0$ Hz, $\text{CH}_2$ ), 3.42 (2H, t, $J = 6.3$ Hz, $\text{CH}_2$ ), 3.32 (2H, s, $\text{NH}_2$ ) 6.57 (2H, d, $J = 9.0$ Hz, 2 x ArH), 7.23 (2H, d, $J = 9.0$ Hz, 2 x ArH) $^{13}\text{C NMR}$ (75 MHz, $\text{CDCl}_3$ ): $\delta$ 34.45, 39.94, 116.79, 127.82, 132.02, 146.26, 167.62 ppm..                                                          |
| a   |    | $^1\text{H NMR}$ (300 MHz, $\text{CDCl}_3$ ): $\delta$ 2.73-2.94 (2H, m, $\text{CH}_2$ ), 4.60 (1H, brs, NH), 4.74 (1H, dd, $J = 13.2$ & 3.3 Hz, CH), 6.70–7.50 (8H, m, Ar-H), 7.86 (1H, dd, $J = 15$ & 9 Hz ArH) $^{13}\text{C NMR}$ (75 MHz, $\text{CDCl}_3$ ): $\delta$ 46.5, 58.5, 116.0, 118.5, 119.0, 126.7, 127.6, 128.5, 129.0, 135.5, 141.1, 151.7, 193.4 ppm.                                                           |
| d   |    | $^1\text{H NMR}$ (300 MHz, $\text{CDCl}_3$ ): $\delta$ 1.27 (6H, d, $J = 6.9$ Hz, 2 x $\text{CH}_3$ ) 2.73-2.98 (2H, m, $\text{CH}_2$ ), 4.52 (1H, brs, NH), 4.73 (1H, dd, $J = 13.8$ & 3.9 Hz, CH), 6.68–7.40 (8 H, m, ArH), 7.88 (1H, dd, ArH) $^{13}\text{C NMR}$ (75 MHz, $\text{CDCl}_3$ ): $\delta$ 23.97, 33.86, 46.40, 58.22, 115.87, 118.34, 118.99, 126.64, 127.01, 127.61, 135.37, 138.33, 149.30, 151.61, 193.52 ppm. |
| e   |  | $^1\text{H NMR}$ (300 MHz, $\text{CDCl}_3$ ): $\delta$ 2.89 (2H, m, $\text{CH}_2$ ), 4.64 (1H, brs, NH), 5.24 (1H, dd, $J = 12.6$ & 4.0 Hz, CH), 6.69–7.68 (7H, m, ArH), 7.85 (1H, dd, ArH). $^{13}\text{C NMR}$ (75 MHz, $\text{CDCl}_3$ ): $\delta$ 44.1, 54.2, 116.2, 118.6, 119.0, 127.5, 127.64, 129.4, 130.0, 132.8, 135.5, 138.4, 151.7, 193.0 ppm.                                                                        |
| c   |  | $^1\text{H NMR}$ (300 MHz, $\text{CDCl}_3$ ): $\delta$ 2.36 (3H, s, $\text{CH}_3$ ), 2.84 (2H, m, $\text{CH}_2$ ), 4.67 (1H, brs, NH), 4.70 (1H, dd, $J = 11.9$ & 3.8 Hz, CH), 6.69–7.48 (7H, m, ArH), 7.84 (1H, dd, ArH). $^{13}\text{C NMR}$ (75 MHz, $\text{CDCl}_3$ ): $\delta$ 21.4, 46.5, 58.2, 116.0, 118.4, 119.0, 126.6, 127.6, 129.7, 135.4, 138.1, 138.3, 151.7, 193.6 ppm.                                            |
| b   |  | $^1\text{H NMR}$ (300 MHz, $\text{CDCl}_3$ ): $\delta$ 2.85 (2H, m, $\text{CH}_2$ ), 3.81 (3H, s, $\text{OCH}_3$ ), 4.50 (1H, brs, NH), 4.70 (1H, dd, $J = 13.7$ & 3.4 Hz, CH), 6.68–7.37 (7H, m, ArH), 7.86 (1H, dd, ArH). $^{13}\text{C NMR}$ (75 MHz, $\text{CDCl}_3$ ): $\delta$ 46.4, 55.4, 58.0, 114.3, 116.0, 118.4, 119.0, 127.6, 127.9, 133.1, 135.4, 151.7, 159.7, 193.7 ppm.                                           |
| og  |  | $^1\text{H NMR}$ (300 MHz, $\text{CDCl}_3$ ): $\delta$ 2.87 (2H, m, $\text{CH}_2$ ), 4.68 (1H, brs, NH), 4.89 (1H, dd, $J = 12.6$ & 4.6 Hz, CH), 6.70–7.58 (7H, m, ArH), 7.86 (1H, dd, ArH) $^{13}\text{C NMR}$ (75 MHz, $\text{CDCl}_3$ ): $\delta$ 46.2, 57.8, 116.2, 119.1, 121.7, 123.5, 127.6, 129.5, 130.2, 132.4, 132.9, 135.8, 143.3, 148.6, 151.1, 192.28 ppm.                                                           |

|   |                                                                                    |                                                                                                                                                                                                                                                                                                                                                                                                                                                             |
|---|------------------------------------------------------------------------------------|-------------------------------------------------------------------------------------------------------------------------------------------------------------------------------------------------------------------------------------------------------------------------------------------------------------------------------------------------------------------------------------------------------------------------------------------------------------|
| f | 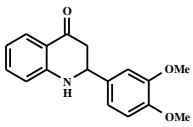  | $^1\text{H NMR (300 MHz, CDCl}_3\text{): } \delta$ 2.87 (2H, m, CH <sub>2</sub> ), 3.86 (6H, s, 2 x OCH <sub>3</sub> ), 4.48 (1H, brs, NH), 4.78 (1H, dd, $J = 13.2$ & 4.0 Hz, CH), 6.70–7.33 (6H, m, ArH), 7.85 (1H, dd, ArH). $^{13}\text{C NMR (75 MHz, CDCl}_3\text{): } \delta$ 46.7, 56.02, 58.4, 56.06, 109.5, 111.3, 116.0, 118.5, 119.02, 119.0, 127.6, 133.6, 149.1, 149.3, 151.7, 135.5, 193.5 ppm.                                              |
| e |   | $^1\text{H NMR (300 MHz, CDCl}_3\text{): } \delta$ 2.90 (2H, m, CH <sub>2</sub> ), 4.54 (1H, brs, NH), 4.81 (1H, dd, $J = 13.7$ & 4.0 Hz, CH), 6.72–7.39 (7H, m, ArH), 7.84 (1H, dd, ArH). $^{13}\text{C NMR (75 MHz, CDCl}_3\text{): } \delta$ 46.4, 57.9, 116.1, 118.7, 119.0, 127.6, 128.1, 129.2, 134.2, 135.6, 139.6, 151.0, 193.0 ppm.                                                                                                                |
|   |   | $^1\text{H NMR (300 MHz, CDCl}_3\text{): } \delta$ 2.92 (1H, dd, $J = 16.1$ & 5.4 Hz, CH <sub>2</sub> ), 3.00 (1H, dd, $J = 16.3$ & 9.8 Hz, CH <sub>2</sub> ), 4.79–4.84 (2H, m, CH & NH), 6.25 (1H, d, $J = 3.2$ Hz, ArH), 6.32 (1H, m, ArH), 7.37 (1H, s, ArH), 7.84 (1H, dd, $J = 7.9$ & 1.2 Hz, ArH). $^{13}\text{C NMR (75 MHz, CDCl}_3\text{): } \delta$ 41.9, 50.7, 106.8, 110.3, 116.0, 118.5, 119.1, 127.3, 135.4, 142.4, 150.4, 153.3, 192.6 ppm. |
| h |  | $^1\text{H NMR (300 MHz, CDCl}_3\text{): } \delta$ 2.5 -2.62 (7H, m, 2 x CH <sub>3</sub> & 1H from CH <sub>2</sub> ), 3.19–3.30 (1H, m, 1H from CH <sub>2</sub> ) 4.52 (1H, brs, NH), 4.73 (1H, dd, $J = 15.6$ & 3.6 Hz, CH), 6.70–7.37 (6H, m, ArH), 7.92 (1H, dd, ArH). $^{13}\text{C NMR (75 MHz, CDCl}_3\text{): } \delta$ 20.50, 21.42, 54.16, 115.95, 118.02, 118.65, 127.88, 127.98, 129.72, 129.91, 135.28, 135.36, 137.02, 151.93, 193.84 ppm.     |

1  
2  
3  
4  
5  
6  
7  
8  
9  
10  
11  
12  
13  
14  
15  
16  
17  
18  
19  
20  
21  
22  
23  
24  
25  
26  
27  
28  
29  
30  
31  
32  
33  
34  
35  
36  
37  
38  
39  
40  
41  
42  
43  
44  
45  
46  
47  
48  
49  
50  
51  
52  
53  
54  
55  
56  
57  
58  
59  
60  
61  
62  
63  
64  
65
